# Supplementary material
Source: PubMed Central journal article supplement (PMC4148793)
Supplement: AEM.00802-14_zam999105511so1.pdf [file AEM.00802-14_zam999105511so1.pdf]

NA32→      NA42→

BLLJ\_1840    1 MKINNKGKGA<sup>1</sup>IAA<sup>1</sup>TTAAAT<sup>1</sup>LLSCG<sup>1</sup>----LAAASASAAGVDY<sup>1</sup>LPTIGQVPTYTKFQPTAD

Ct1,3Gal    1 MVKKN<sup>1</sup>VGLRFLS<sup>1</sup>IL<sup>1</sup>LLMALL<sup>1</sup>IGNVQSFNVAAAEGV<sup>1</sup>IVNGTQF-----

Sa1,3Gal    1 ----MILFALCLAFAGALTTAGPA<sup>1</sup>----RAAAQTLTNGTQF-----

Fo1,3Gal    1 ---MMPRF<sup>1</sup>FSTLLA<sup>1</sup>VLAAS<sup>1</sup>TVQ<sup>1</sup>-----ASLD<sup>1</sup>IVSGATW-----

Ss1,3Gal    1 -----ASFTL<sup>1</sup>GATR-----

Il1,3Gal    1 ----MLWLRK<sup>1</sup>VIPV<sup>1</sup>FLSLV<sup>1</sup>VAAR<sup>1</sup>-----AETQ<sup>1</sup>IVSGAAW-----

Pc1,3Gal    1 ----MQIFAH<sup>1</sup>LLLPALS<sup>1</sup>LLPAY<sup>1</sup>-----AQNQ<sup>1</sup>IVSGAAW-----

  

BLLJ\_1840    57 PGKNASDYFQPYWYAKNANDNGG<sup>57</sup>THIQAHGG<sup>57</sup>QVVKVGD<sup>57</sup>DAYWYGEDRSNGYD<sup>57</sup>---NSPGV

Ct1,3Gal    43 -----KDT<sup>43</sup>S-GNVI<sup>43</sup>HAHGG<sup>43</sup>MLKHG<sup>43</sup>DYYYWYGEY<sup>43</sup>RDDSN<sup>43</sup>---LFLGV

Sa1,3Gal    34 -----TD<sup>34</sup>T<sup>34</sup>S-GNGV<sup>34</sup>HAHGG<sup>34</sup>VIKVG<sup>34</sup>GYYYWFGEDRNADN<sup>34</sup>---TFKYV

Fo1,3Gal    31 -----TA<sup>31</sup>TNT<sup>31</sup>GEHV<sup>31</sup>QA<sup>31</sup>HGH<sup>31</sup>GLIEVD<sup>31</sup>GTY<sup>31</sup>MI<sup>31</sup>GEDK<sup>31</sup>TDGT<sup>31</sup>---YFQNV

Ss1,3Gal    10 -----TD<sup>10</sup>QN<sup>10</sup>-GNT<sup>10</sup>L<sup>10</sup>QLHGL<sup>10</sup>GII<sup>10</sup>KVG<sup>10</sup>STWY<sup>10</sup>GF<sup>10</sup>GEDK<sup>10</sup>TGET<sup>10</sup>SSD<sup>10</sup>TS<sup>10</sup>FQDI

Il1,3Gal    31 -----TD<sup>31</sup>T<sup>31</sup>S-GNVI<sup>31</sup>QA<sup>31</sup>HGAG<sup>31</sup>ILKVG<sup>31</sup>STFY<sup>31</sup>WFGEDK<sup>31</sup>TENSA<sup>31</sup>---LFHAV

Pc1,3Gal    31 -----TD<sup>31</sup>TA<sup>31</sup>-GNT<sup>31</sup>IQAHGAG<sup>31</sup>ILQVG<sup>31</sup>STFY<sup>31</sup>WFGEDK<sup>31</sup>SHNSA<sup>31</sup>---LFKAV

  

BLLJ\_1840    114 HAYMSTDLYNWTDLGVALRAVTSKSQLT<sup>114</sup>DKSNADYAYFDKAYNLT<sup>114</sup>TKSDGSVDAAKADAI<sup>114</sup>F

Ct1,3Gal    81 SCYRSKDLVNWEYRGEVLSRNS-<sup>81</sup>AP<sup>81</sup>ELNHCN-----

Sa1,3Gal    72 DAYRSTD<sup>72</sup>LKNWEFRSHVLTQAG<sup>72</sup>-ASELASAN-----

Fo1,3Gal    70 NCYSS<sup>70</sup>TNLVEW<sup>70</sup>TYRGALLSRTSEAGDLGPNR-----

Ss1,3Gal    52 PCYTSTD<sup>52</sup>LSSW<sup>52</sup>TYQGVALAKQA<sup>52</sup>-SGDLG<sup>52</sup>PSR-----

Il1,3Gal    70 SCYTSTD<sup>70</sup>LTNWTRQSNALSPVA<sup>70</sup>-NIMISSNN-----

Pc1,3Gal    70 SCYTSSDLVNWSRQNDALSPIA<sup>70</sup>-GTMISTSN-----

  

\*Glu196 (General base)

BLLJ\_1840    174 PYLNTNPDQDGDGAVDSVQGI<sup>174</sup>FERP<sup>174</sup>KIIYNKKNQ<sup>174</sup>YVLW<sup>174</sup>WHS<sup>174</sup>DGSTTPGG<sup>174</sup>SNYARALAGV

Ct1,3Gal    111 -----I<sup>111</sup>-ERP<sup>111</sup>KVMYNAST<sup>111</sup>GEFV<sup>111</sup>M<sup>111</sup>M<sup>111</sup>HW<sup>111</sup>E-----NGIN<sup>111</sup>Y<sup>111</sup>GQARA<sup>111</sup>AV

Sa1,3Gal    102 -----I<sup>102</sup>-ERP<sup>102</sup>KVMYNAST<sup>102</sup>GKFV<sup>102</sup>M<sup>102</sup>M<sup>102</sup>M<sup>102</sup>HK<sup>102</sup>E-----NG<sup>102</sup>T<sup>102</sup>DYSEARA<sup>102</sup>AV

Fo1,3Gal    101 -----I<sup>101</sup>VERP<sup>101</sup>KVIYND<sup>101</sup>QTKK<sup>101</sup>Y<sup>101</sup>V<sup>101</sup>LY<sup>101</sup>M<sup>101</sup>H<sup>101</sup>ID-----SPDY<sup>101</sup>KDARV<sup>101</sup>GI

Ss1,3Gal    82 -----I<sup>82</sup>VERP<sup>82</sup>KVIYNAST<sup>82</sup>STY<sup>82</sup>V<sup>82</sup>M<sup>82</sup>M<sup>82</sup>H<sup>82</sup>ID-----ST<sup>82</sup>NYGDARV<sup>82</sup>GV

Il1,3Gal    100 -----I<sup>100</sup>VERP<sup>100</sup>KVLFN<sup>100</sup>KKNQ<sup>100</sup>EY<sup>100</sup>VM<sup>100</sup>WF<sup>100</sup>H<sup>100</sup>SD-----SS<sup>100</sup>NYGAAMV<sup>100</sup>GV

Pc1,3Gal    100 -----I<sup>100</sup>VERP<sup>100</sup>KVIFN<sup>100</sup>QKNSEY<sup>100</sup>VM<sup>100</sup>WF<sup>100</sup>H<sup>100</sup>SD-----SS<sup>100</sup>NYGAAMV<sup>100</sup>GV

  

(Modulator of general acid) \*Asp274

BLLJ\_1840    234 AVSDNPAGPFTMVGAYRLPNQNNWKEAAGNPSWGENGDSRD<sup>234</sup>MTV<sup>234</sup>FVD<sup>234</sup>PKD<sup>234</sup>-DSAYVLYSS

Ct1,3Gal    145 AYSKTPDGKFTYIRSF<sup>145</sup>R-PMQDTGVM<sup>145</sup>DHGLPGY<sup>145</sup>----MSRDCNV<sup>145</sup>FVD<sup>145</sup>TDG<sup>145</sup>---KCYFISAA

Sa1,3Gal    136 AVSD<sup>136</sup>TV<sup>136</sup>DG<sup>136</sup>TY<sup>136</sup>TW<sup>136</sup>QGSF<sup>136</sup>Q-PLGQ-----Y----MSRDITV<sup>136</sup>FVD<sup>136</sup>TDG<sup>136</sup>---TGYMVSAA

Fo1,3Gal    135 ATGDSVCGK<sup>135</sup>YTY<sup>135</sup>HR<sup>135</sup>SFR-PLGK-----QSRDMGL<sup>135</sup>FKDD<sup>135</sup>DG<sup>135</sup>---SAYLL-TE

Ss1,3Gal    116 ATSS<sup>116</sup>TPCGPY<sup>116</sup>SYRGS<sup>116</sup>SFR-PMGN-----LSRDMN<sup>116</sup>LFQD<sup>116</sup>TDG<sup>116</sup>---TGYLL-SE

Il1,3Gal    134 ATAK<sup>134</sup>TPCGPY<sup>134</sup>TFKGS<sup>134</sup>FK-PLGA-----DSRDEGL<sup>134</sup>FQDD<sup>134</sup>SAQ<sup>134</sup>TAYLLYAS

Pc1,3Gal    134 ATAK<sup>134</sup>TPCGPY<sup>134</sup>TYKGS<sup>134</sup>FK-PLGA-----DSRDESI<sup>134</sup>FQDD<sup>134</sup>SAQ<sup>134</sup>TAYLLYAS

  

BLLJ\_1840    293 E<sup>293</sup>ANATLYIAKLND<sup>293</sup>DYTN<sup>293</sup>VKTTNVDQSEGQKQYSADGQYPYILADATTDAPV<sup>293</sup>RGEDFQIV

Ct1,3Gal    198 NENMDLHLYELTPDYKNI-----ASL<sup>198</sup>KAK<sup>198</sup>LFV<sup>198</sup>G-----

Sa1,3Gal    179 RENYDLQ<sup>179</sup>TYRLTADY<sup>179</sup>TGI-----DSL<sup>179</sup>VAD<sup>179</sup>PWH<sup>179</sup>G-----

Fo1,3Gal    176 DREY<sup>176</sup>GTRIMALSDDY<sup>176</sup>LVN-----TE<sup>176</sup>ITYE<sup>176</sup>WQ-----

Ss1,3Gal    157 DRN<sup>157</sup>GLHIYKLSADY<sup>157</sup>LSV-----DS<sup>157</sup>AVALL<sup>157</sup>GGSG-----

Il1,3Gal    178 DNN<sup>178</sup>QNFKISR<sup>178</sup>LD<sup>178</sup>NY<sup>178</sup>YNV-----TA<sup>178</sup>QASV<sup>178</sup>LTG-----

Pc1,3Gal    178 DNN<sup>178</sup>QNFKISR<sup>178</sup>LD<sup>178</sup>NY<sup>178</sup>YNV-----TA<sup>178</sup>QVS<sup>178</sup>VM<sup>178</sup>NG-----

  

\*Glu359 (General acid)

BLLJ\_1840    353 KQNGSLEAPAVFQYDGRYNI<sup>353</sup>IASGATGWAPNK<sup>353</sup>QTY<sup>353</sup>YTAD<sup>353</sup>SMLGN<sup>353</sup>WTRGVEKDDVNENTWY

Ct1,3Gal    226 ---Q<sup>226</sup>REAP<sup>226</sup>CLIKRNG<sup>226</sup>Y<sup>226</sup>YLITS<sup>226</sup>GCTGWNPNQAKYAYS<sup>226</sup>KDLASGWS-----QLY

Sa1,3Gal    207 ---CH<sup>207</sup>REAP<sup>207</sup>ALFKRGGVYF<sup>207</sup>MLTSGATGWNPNQ<sup>207</sup>QYATATSLAGPWT-----AMT

Fo1,3Gal    202 ---Y<sup>202</sup>FAES<sup>202</sup>PAM<sup>202</sup>LKONGY<sup>202</sup>YFIFGSHLTGWNANDNI<sup>202</sup>YSYAKSLSGPWS-----NWT

Ss1,3Gal    186 --S<sup>186</sup>ASFEAPAMVKSNGTY<sup>186</sup>YLLASHLTG<sup>186</sup>WSTNDNVYTTATSLSGTWA-----PMR

Il1,3Gal    205 ---AT<sup>205</sup>LEAPGIVKHS<sup>205</sup>GKYFLIASHTSGWAPNPNK<sup>205</sup>FFSASSLSGPWS-----SQQ

Pc1,3Gal    205 ---AT<sup>205</sup>LEAPGIVKHNGEY<sup>205</sup>FLIASHTSGWAPNPNK<sup>205</sup>WFSASSLAGPWS-----AQQ

Fig. S1. (Continued)

BLLJ\_1840 413 **N**NMPEGADGLLS**V**GDTRGTT**F**GSQSAS**V**LAVDQEK**G**--HF**I**Y**L**GDRW**D**SGK---AD**S**T**Y**  
 Ct1,3Gal 272 **N**-----L**G**N--S**T**TYRSQ**P**TF**I**IPVQ**G**SS**G**T--SY**L**Y**M**GDRWAGAW**G**GK**V**ND**S**Q**Y**  
 Sa1,3Gal 253 **N**-----V**G**D--S**T**AYGSQ**T**AY**V**LPVQ**G**TS**G**T--SY**L**Y**L**GDRW**G**NS**F**GG**S**VND**S**SR**Y**  
 Fo1,3Gal 248 **E**-----F**A**PV**G**SK**T**Y**Q**SQ**V**SY**I**Q**P**L---G**N**G**N**A**I**Y**I**GDRW**V**ST**N**---L**A**A**S**T**Y**  
 Ss1,3Gal 233 **N**-----F**A**AP**G**TH**T**Y**N**SQ**T**A**N**I**I**TVQ**G**SS**G**T--T**Y**I**Y**AGDRW**N**AS**D**---L**G**NS**Q**L  
 Il1,3Gal 251 **D**-----I**T**TAS**T**RT**W**Y**S**Q**N**AF**D**L**L**PL---G**N**-N**A**I**Y**M**G**DRW**R**PS**L**---L**G**SS**R**Y  
 Pc1,3Gal 251 **D**-----I**A**PSA**T**RT**W**Y**S**Q**N**AF**D**L**L**PL---G**S**-N**A**I**Y**M**G**DRW**R**PS**L**---L**G**SS**R**Y  
←CΔ762

BLLJ\_1840 467 **V**WL**P**L**T**I**G**EN**T**I**E**M**H**N**P**AQ**E**GE**P**D**G**W**D**LS**Y**W**G**N**H**GS**A**K**G**L**V**N**W**T**V**ET**G**DD**L**P**K**T**V**NT**G**  
 Ct1,3Gal 318 **V**WL**P**L**N**F**I**S**D**T**T**I**E**L-----P**Y**Y**D**SV  
 Sa1,3Gal 299 **V**WL**P**L**T**F**P**T**S**T**S**L**S**M-----S**W**Y**P**EV-----  
 Fo1,3Gal 290 **V**WL**P**L**K**V-D**G**T**K**V**T**L-----S**W**Y**D**SW-----  
 Ss1,3Gal 278 **I**W**L**P**M**T**I**-R**G**T**V**V**N**V-----G**Q**Y**P**SW-----  
 Il1,3Gal 292 **I**W**Y**P**I**D**F**-S**S**G**S**P**Q**L-----V**H**A**D**V**W**-----  
 Pc1,3Gal 292 **I**W**Y**P**L**D**F**-S**S**G**A**P**Q**I-----V**H**A**D**V**W**-----

BLLJ\_1840 527 **G**T**V**T**L**P**D****T**V**N**V**K**E**G**DD**T**I**A**T**K**V**T**W**N**V**E**GG**T**A**V**S**K**S**T**K**A**AG**N**T**Y**A**F**N**V**P**G**A**Y**T**I**T**G**T**L**A**E**S  
 Ct1,3Gal 339 -----K**I**D**A**SS**G**-----I**I**S**E**Y**I**P**D**T**T**RY**K**L**V**N**K**NS**G**K-----  
 Sa1,3Gal 320 -----T**V**D**T**V**A**G-----T**I**S**G**T**S**A**T**Y**E**T**L**T**A**R**H**S**A**K-----  
 Fo1,3Gal 310 -----S**P**N**L**S**K**G-----T**W**S**E**T**K**M**T**K**I**E**G**E**T**A**T**M**G**N-----  
 Ss1,3Gal 298 -----S**L**D**A**I**A**G-----T**W**T**P**D**S**G**V**P**T**N**A**V**H**T**L**T**D**A-----  
 Il1,3Gal 312 -----S**V**N**P**S**A**G-----T**Y**T**V**A**Q**G**T**T**Y**E**A**E**K**G**T**L**G**G-----  
 Pc1,3Gal 312 -----S**V**N**V**Q**A**G-----T**Y**S**V**A**S**G**T**S**Y**E**A**E**N**G**Q**R**G**G-----

BLLJ\_1840 587 **S**N**F**N**P**G**R**T**F**R**R**T**I**D**V**S**C****S**N**P**I**S**G**S**W**K**E**A**H**W**K**G**S**A**C**Q**V**S**A**S**G--G**A**Y**D**F**T**I**T**D**N**A**N**R**C**V**W**  
 Ct1,3Gal 367 -----V**L**D**V**L---D**G**S**V**D**N**A**A**Q**I**V**Q**W**T**D**N**G--S**L**S**Q**Q**W**Y**I**V**D**V**G**G**G**Y**K**  
 Sa1,3Gal 346 -----C**A**D**V**P---S**Q**S**L**L**T**G**V**A**L**T**Q**Y**T**C**N**G--G**N**N**Q**K**F**W**F**K**S**V**A**G**G**Y**Y**  
 Fo1,3Gal 336 -----D**A**R**I**I---S**C**S**E**C**S**G**G**Q**A**V**G**Y**I**G**G**D**K**K**G**T**L**T**F**K**N**I**K**S**S**G**G**T**A**T  
 Ss1,3Gal 324 -----G**S**S**M**L**M**D**V**A**G**G**S**T**A**T**G**A**K**V**I**Q**W**Q**S**N**G**--G**D**N**Q**K**W**T**L**N**R**V**A**D**N**V**Y**  
 Il1,3Gal 338 -----S**S**K**L**L---S**N**S**G**F**S**G**G**S**A**V**G**Y**L**G**H**G--G**T**V**T**I**N**N**V**Q**G**N**G**G**A**H**W**  
 Pc1,3Gal 338 -----S**S**T**I**L---S**G**S**G**F**S**G**G**K**A**V**G**Y**L**G**H**G--G**T**V**T**I**N**N**V**Q**S**N**G**G**S**H**W**

BLLJ\_1840 645 **T**D**R**N**E**G**S**A**V**Y**Q**P**D**A**L**D**V**N**E**T**L**E**T**T**V**K**P**L**D**L**G**G**N**D**P**R**A**G**L**V**V**R**N**L**A**D**A**N**G**G**K**G**Y**A**T**L**L**A  
 Ct1,3Gal 405 **K**I**V**N**V**K**S**G**R**A-----L**D**V**K**D**E**S**K**E**D**G**G**V**I**I**Q**Y---T**S**N**G**G**Y**N**Q**H**W**K**F**T  
 Sa1,3Gal 384 **E**L**M**G**R**G**S**S-----L**C**L**T**E**N**V**T**A**V**T**Q**E--N**C**T**A**A**T**S**Q**Q**W**S**L**T  
 Fo1,3Gal 376 **I**N**V**K**Y**R**N**G-----D**N**G**S**R**Y**A**T**V-----N**V**N**G**E**S**Q**K**L**A**F**L**S  
 Ss1,3Gal 366 **T**L**V**S**V**K**S**G**L**C-----L**D**V**P**N**K**S**T**A**E**N**V**Q**L**Q**Q**W---T**C**N**G**G**A**N**Q**-Q**F**A**A**  
 Il1,3Gal 376 **V**A**I**Y**F**A**N**G-----D**S**T**Y**R**N**V**T**V-----S**V**N**G**G**S**S---V**L**V  
 Pc1,3Gal 376 **V**A**I**Y**F**A**N**G-----D**S**T**Y**R**N**V**T**V-----S**V**N**G**G**P**S---V**L**V

BLLJ\_1840 705 **S**L**S**G**V**Y**M**Q**Y**D**S**N**A**D**G**Y**I**D**K**E**T**S**H**V**G**T**G**F**G**D**Q**V**Q**L**K**L**E**R**I**S**T**D**T**L**K**G**Y**W**R**A**S**A**N**D**E**W**Q**D**V**A  
 Ct1,3Gal 445 **D**-----I-----G**D**G**Y**Y**K**I**S**R**H**C**G**K**L**I**D**V-----  
 Sa1,3Gal 418 **T**-----S**G**G**Y**V**S**L**K**S**R**A**S**G**E**C**L**D**V**-----  
 Fo1,3Gal 406 **T**-----S**H**L**S**Q**T**G**L**S**R**G**F**F**D**L**K**E**G**---S**D**-----  
 Ss1,3Gal 405 **D**-----L**V**G**S**L**T**G**T**K**F**M**L**V**N**V**N**S**L**N**I**G**V**-----  
 Il1,3Gal 403 **D**-----Q**P**D**S**G**G**G**V**V**I**S**V**P**V**K**V**N**L**N**N**G**A**-----  
 Pc1,3Gal 403 **D**-----Q**P**D**S**G**G**G**N**V**V**I**S**V**P**V**K**L**N**L**N**S**G**E-----  
←CΔ457

BLLJ\_1840 765 **T**V**T**L**T**G**A**D**V**T**G**L**D**A**G**A**F**A**T**S**N**S**N**A**G**A**F**T**V**A**F**N**G**T**A**F**G**S**Q**T**A**A**V**E**S**I**A**A**K**G**P**E**T**T**I**A**K**R**Q**T  
 Ct1,3Gal 465 -----  
 Sa1,3Gal 437 -----  
 Fo1,3Gal 427 -----  
 Ss1,3Gal 429 -----  
 Il1,3Gal 427 -----  
 Pc1,3Gal 427 -----

BLLJ\_1840 825 **L**A**H**K**D**V**T**V**T**A**T**L**T**N**G**K**T**R**V**L**E**P**D**E**Y**T**L**E**G**F**D**T**T**K**L**G**E**Q**T**V**T**V**R**L**V**T**D**S**S**V**T**A**T**L**T**V**T**V**E**S  
 Ct1,3Gal 465 -----  
 Sa1,3Gal 437 -----  
 Fo1,3Gal 427 -----  
 Ss1,3Gal 429 -----  
 Il1,3Gal 427 -----  
 Pc1,3Gal 427 -----

**Fig. S1. (Continued)**

```

BLLJ_1840 885 NLARLFCSSAAASKYEPASWASASTADLTCDNNLSTNWSNWTGDTSPWLSYTFDKAYQ
Ct1,3Gal 465 -----RKWSTEDGGII-----QQWSDAG-GTNQHWKLV-----
Sa1,3Gal 437 -----SGASTANSAAL-----ITYTCNG-GTNQQWTRGT-----
Fo1,3Gal 427 -----NTITISNGD-----GWG-PDVDALMPPAA-----
Ss1,3Gal 429 -----DSSSTTAGAGV-----VQLTGTG-ATSQQWTLT-----
Il1,3Gal 427 -----NSITFGSGQ-----SNYA-ADLDKIIVY-----
Pc1,3Gal 427 -----NSITFGSGQ-----SNYA-ADLDKIIVY-----

BLLJ_1840 945 LGKLSVAVDKAKGEAAPKSFTVSYLAEDNATWTDATLPAVTVNGAAGAVTEADVSAIPAT
Ct1,3Gal 492 -----LVSSPEPSPSPSP-----
Sa1,3Gal -----
Fo1,3Gal -----
Ss1,3Gal -----
Il1,3Gal -----
Pc1,3Gal -----

          ←CΔ257
BLLJ_1840 1005 KGIRLNFTYADGNDYAKIAEVRIAEGEATPEPQPSSNANLADLTVDGKTVDFGFSADITEY
Ct1,3Gal 505 QVVKGDVNGDLKVNSTDFSMRLRRYLLKTI DNFPTENGKQAADLNGDGRINSSDLTMLKRY
Sa1,3Gal -----
Fo1,3Gal -----
Ss1,3Gal -----
Il1,3Gal -----
Pc1,3Gal -----

BLLJ_1840 1065 AGALAGDAASYPTVEATAADAKATVQVEQASTENSGVATVTVTAE DGTAEYTVTFGELP
Ct1,3Gal 565 LLMEVDL-----
Sa1,3Gal -----
Fo1,3Gal -----
Ss1,3Gal -----
Il1,3Gal -----
Pc1,3Gal -----

BLLJ_1840 1125 QLAEELAVEVTKDSYQVGDKFNAADVKVS AIYKVGDTETLRKLI DPTDGLKFTGFDSATA
Ct1,3Gal -----
Sa1,3Gal -----
Fo1,3Gal -----
Ss1,3Gal -----
Il1,3Gal -----
Pc1,3Gal -----

BLLJ_1840 1185 GTKTITVSYRGVNATFEVTVTATEVTPGPGEQKPGDTN NPGNTAKPGNTATNEPAANGAA
Ct1,3Gal -----
Sa1,3Gal -----
Fo1,3Gal -----
Ss1,3Gal -----
Il1,3Gal -----
Pc1,3Gal -----

BLLJ_1840 1245 PLSNTGAAVA AIAVVVVALAAAAGALLVIRKRA
Ct1,3Gal -----
Sa1,3Gal -----
Fo1,3Gal -----
Ss1,3Gal -----
Il1,3Gal -----
Pc1,3Gal -----

```

**Fig. S1. Multiple sequence alignment of BLLJ\_1840 and characterized exo-β-1,3-galactanases.** The alignment was created using the MUSCLE program (<http://www.ebi.ac.uk/Tools/msa/muscle/>) and BoxShade 3.21 ([http://www.ch.embnet.org/software/BOX\\_form.html](http://www.ch.embnet.org/software/BOX_form.html)). Identical residues and conservative substitutions are highlighted in black and dark gray, respectively. Asterisks indicate the predicted catalytic residues for BLLJ\_1840. The *arrows* indicate the deleted position of deletion mutants.

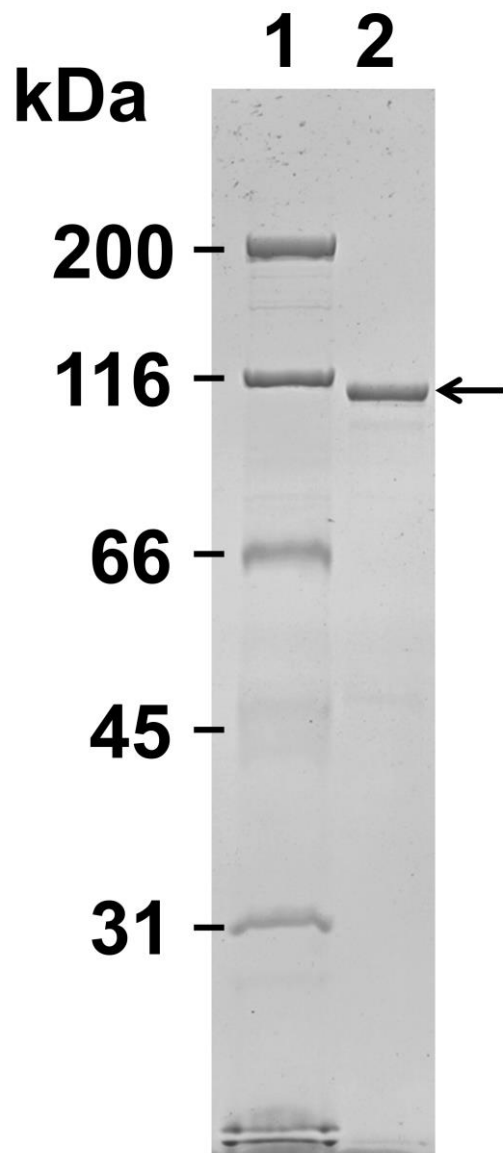

**Fig. S2. SDS-PAGE analysis of recombinant BLLJ\_1840.** Purified BLLJ\_1840-N $\Delta$ 42C $\Delta$ 257 was electrophoresed on a 10% polyacrylamide gel and stained with Coomassie Brilliant Blue R-250. Lane 1, molecular size markers; lane 2, purified enzyme;. The *arrow* indicates the band that corresponds to BLLJ\_1840-N $\Delta$ 42C $\Delta$ 257.

**A**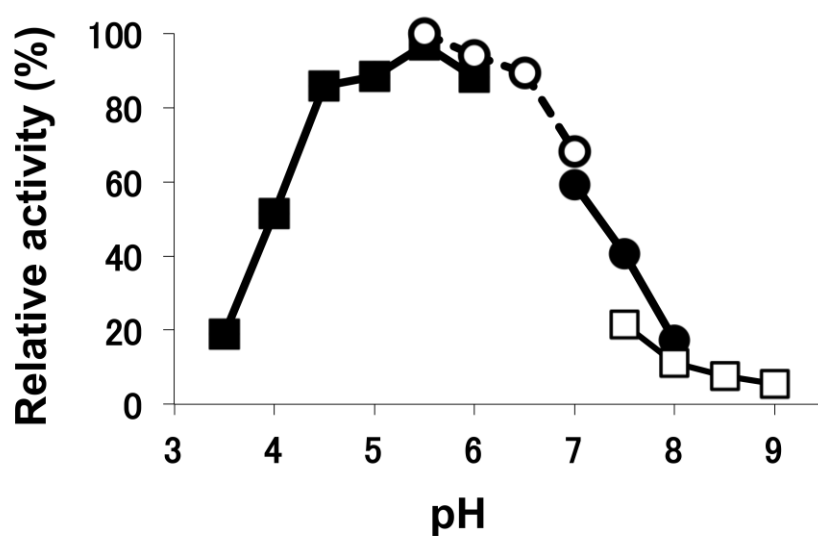**B**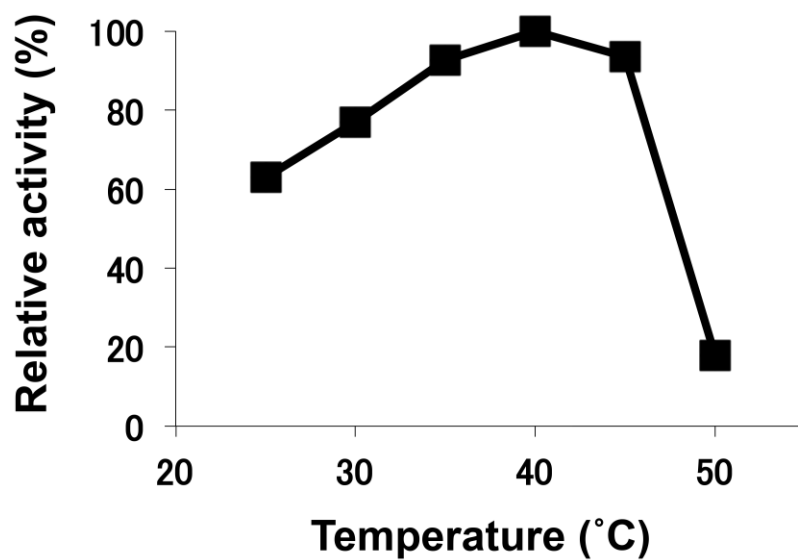

**Fig. S3. Effects of pH and temperature on the activity of BLLJ\_1840.** (A) pH dependence of BLLJ\_1840 activity in various buffers at 40°C for 20 min. Enzyme activities were expressed as the percentage of activity in MES buffer at pH 5.5. (B) Temperature dependence of BLLJ\_1840 activity for 20 min. The enzymatic activities were expressed as the percentage of the activity at 40°C. Buffers: sodium acetate (closed square), MES (open circle), HEPES (closed circle), Tris-HCl (open square).

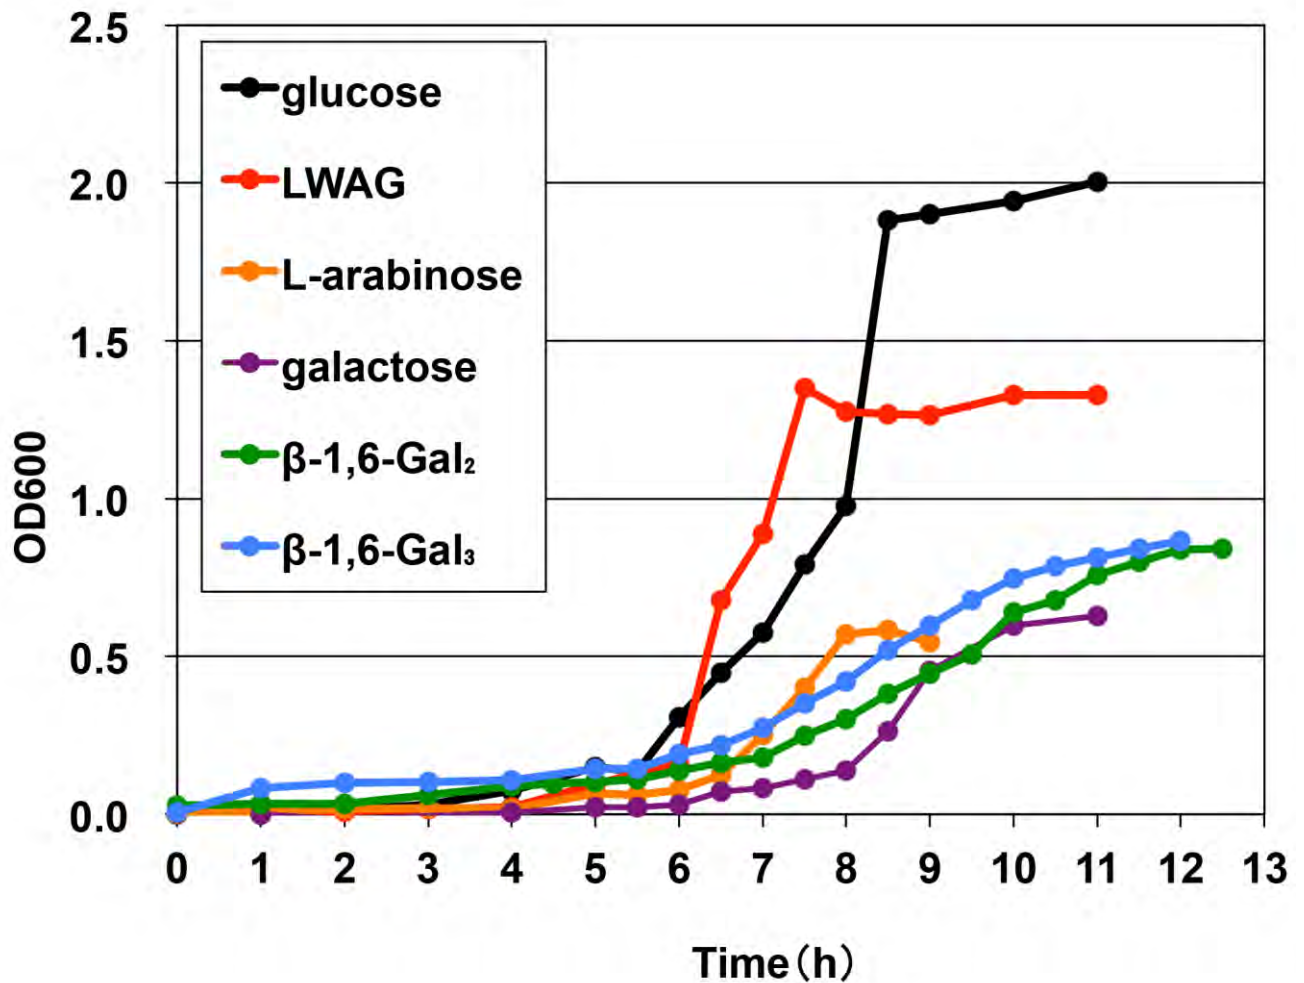

**Fig. S4. Growth curves of *B. longum* JCM1217 using several carbohydrate sources.** *B. longum* JCM1217 was grown on PYF medium containing 1.0% L-arabinose, glucose, galactose,  $\beta$ -1,6-Gal<sub>2</sub>,  $\beta$ -1,6-Gal<sub>3</sub>, or LWAG.

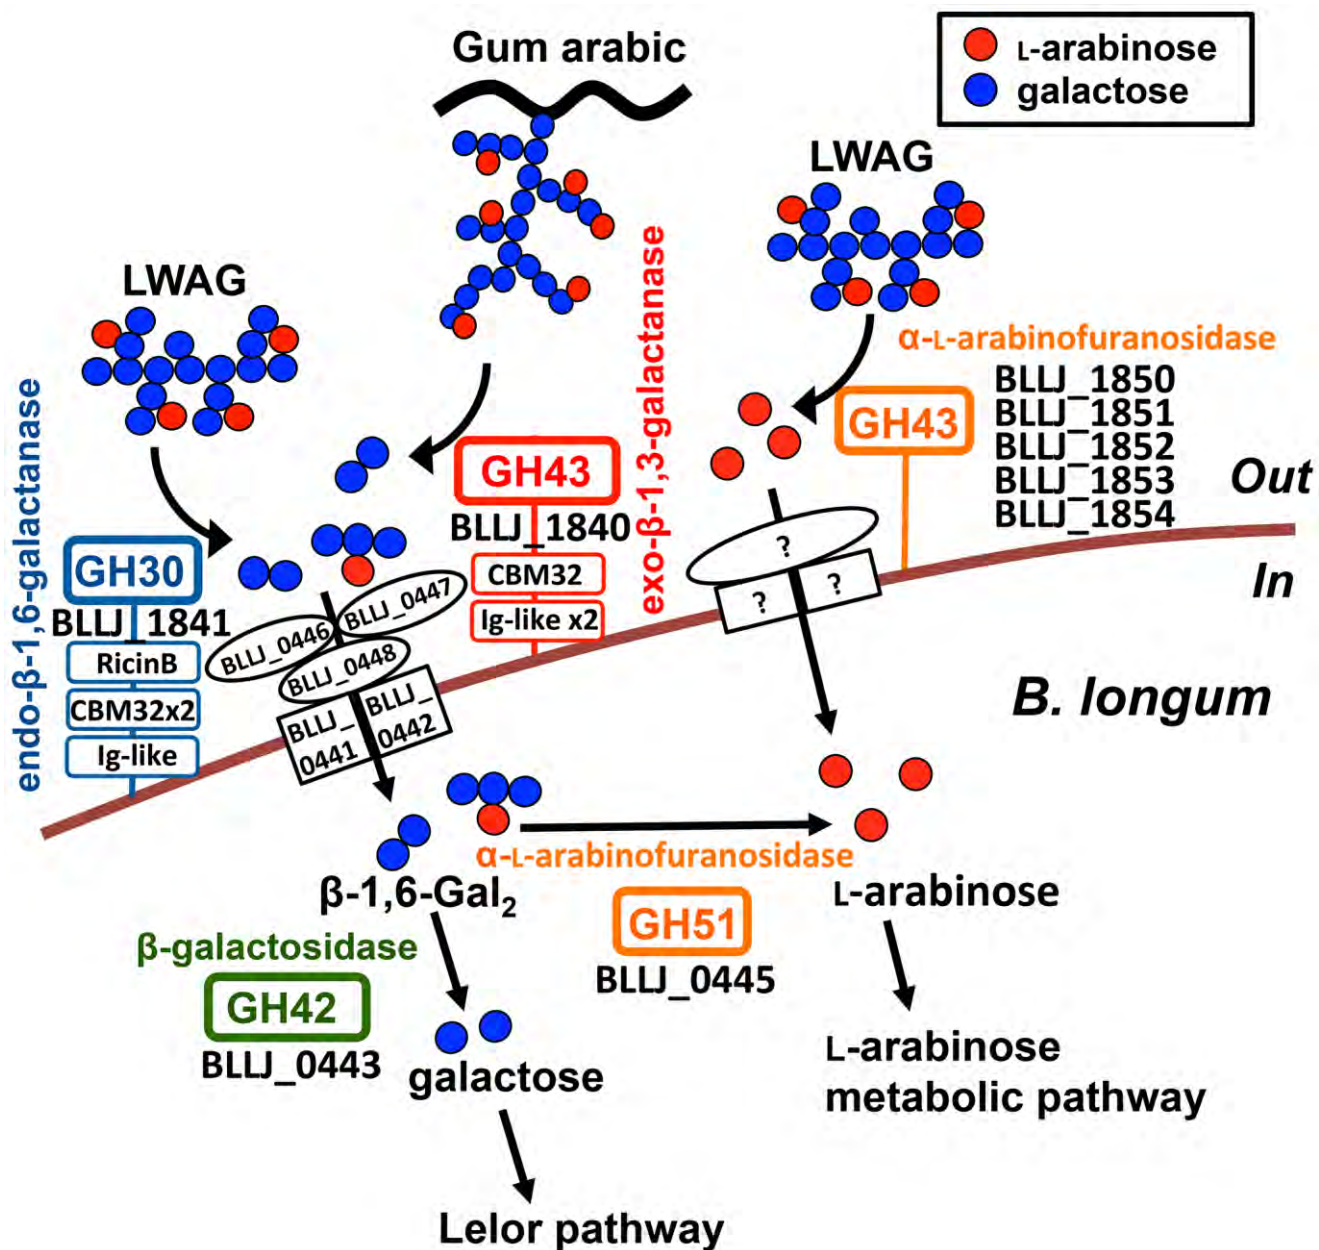

Fig. S5. Schematic AG-II metabolic pathway in *B. longum* subsp. *longum*.

**Table S1. The primers used for deletion mutagenesis and quantitative real-time PCR.**

| Primers                        | Sequence of oligonucleotide primers |
|--------------------------------|-------------------------------------|
| NΔ reverse <sup>a</sup>        | 5'- CATGGTATATCTCCTTCTTAAAGTT -3'   |
| NΔ42 forward <sup>a</sup>      | 5'- CAAGTGCCGACATACACCAAGTTCC -3'   |
| CΔ forward <sup>a</sup>        | 5'- CTCGAGCACCACCACCACCACCTG -3'    |
| CΔ257 reverse <sup>a</sup>     | 5'- TTCAGCGATCTTGGCATAGTCATTGC -3'  |
| CΔ457 reverse <sup>a</sup>     | 5'- ACCGAACGCAGTGCCGTTGAAGGCCAC -3' |
| CΔ762 reverse <sup>a</sup>     | 5'- GCCGGTTTCCACAGTCCAGTTGACCA -3'  |
| rpoB forward <sup>b</sup>      | 5'- CGTCGACGATATCGATCACTTC -3'      |
| rpoB reverse <sup>b</sup>      | 5'- CGCAGCTGGTTCTGAATCAG -3'        |
| BLLJ_1840 forward <sup>b</sup> | 5'- GCACCATCGAAATGCACAAT -3'        |
| BLLJ_1840 reverse <sup>b</sup> | 5'- GGTTGCCCCAATAGCTCAGA -3'        |
| BLLJ_1841 forward <sup>b</sup> | 5'- CACAGTCGGCACGAAGGTT -3'         |
| BLLJ_1841 reverse <sup>b</sup> | 5'- TTACATTGCGCAGAGTCCATGT -3'      |

<sup>a</sup>The primers used for deletion mutagenesis.

<sup>b</sup>The primers used for quantitative real-time PCR.
